# Supplementary material for: Hierarchical core–shell α-Fe2O3@C nanotubes as a high-rate and long-life anode for advanced lithium ion batteries
Source: Royal Society of Chemistry journal article supplement (doi:10.1039/c3ta14649a), 2013-12-05
Supplement: c3ta14649a.pdf [file c3ta14649a.pdf]

## Supporting Information

### Hierarchical Core-Shell $\alpha$ -Fe<sub>2</sub>O<sub>3</sub>@C Nanotubes as a High-Rate and Long-life Anode for Advanced Lithium Ion Batteries

Xin Gu,<sup>a</sup> Liang Chen,<sup>a</sup> Shuo Liu,<sup>a</sup> Huayun Xu,<sup>a</sup> Jian Yang\*<sup>a</sup>, and Yitai Qian<sup>ab</sup>

[a] Key Laboratory of Colloid and Interface Chemistry, Ministry of Education. School of Chemistry and Chemical Engineering, Shandong University, Jinan, 250100, P.R. China.  
E-mail: yangjian@sdu.edu.cn

[b] Hefei National Laboratory for Physical Science at Microscale. Department of Chemistry, University of Science and Technology of China, Hefei, 230026, P.R. China

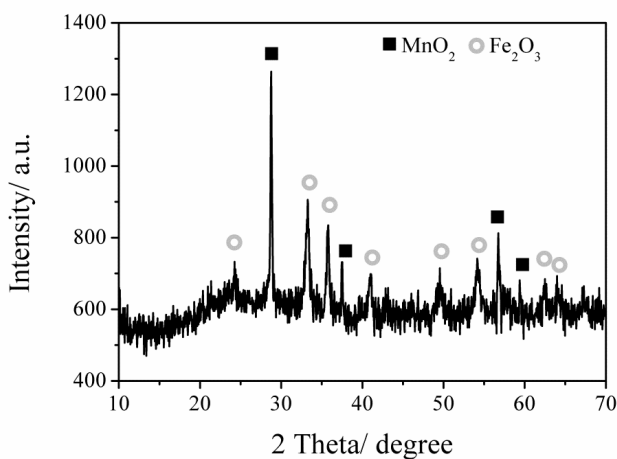

Fig. S1 XRD pattern of the  $\beta$ -MnO<sub>2</sub>/ $\alpha$ -Fe<sub>2</sub>O<sub>3</sub> nanorods.

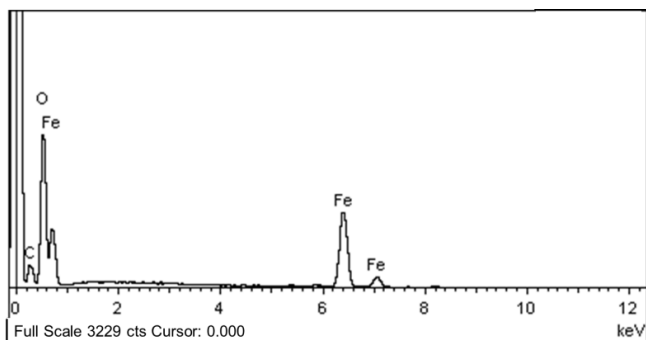

Fig. S2 EDS spectra of branched core-shell  $\alpha$ -Fe<sub>2</sub>O<sub>3</sub>@C nanotubes.

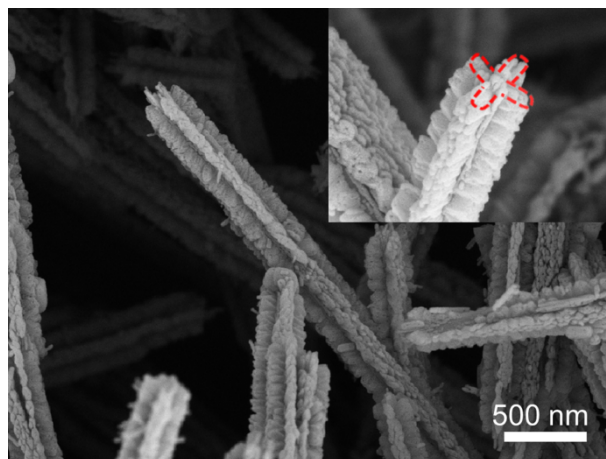

Fig. S3 SEM image of branched  $\beta$ - $\text{MnO}_2/\alpha$ - $\text{Fe}_2\text{O}_3$  nanostructures.

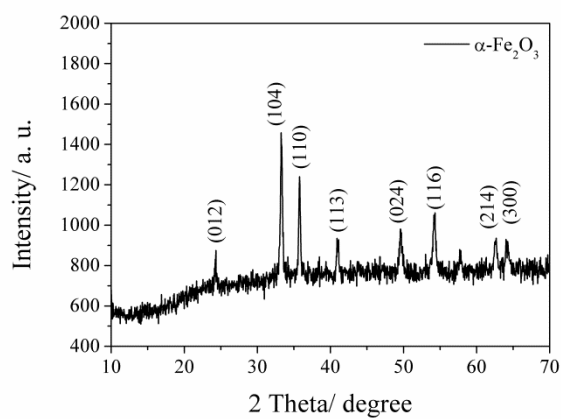

Fig. S4 XRD pattern of  $\alpha$ - $\text{Fe}_2\text{O}_3$  obtained from  $\alpha$ - $\text{Fe}_2\text{O}_3$ @C nanotubes treated at 600 °C in air.

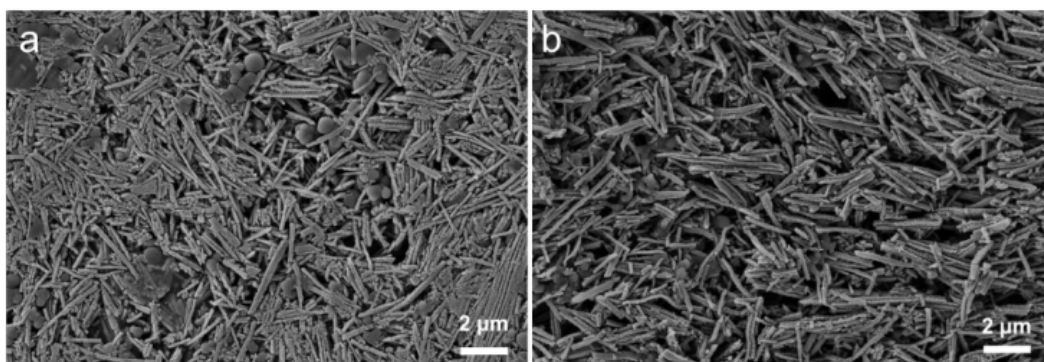

Fig. S5 SEM images of the electrode based on the branched core-shell  $\alpha$ - $\text{Fe}_2\text{O}_3$ @C nanotubes (a) before and (b) after 10 cycles of cycling at a current density of 1 A g<sup>-1</sup>.

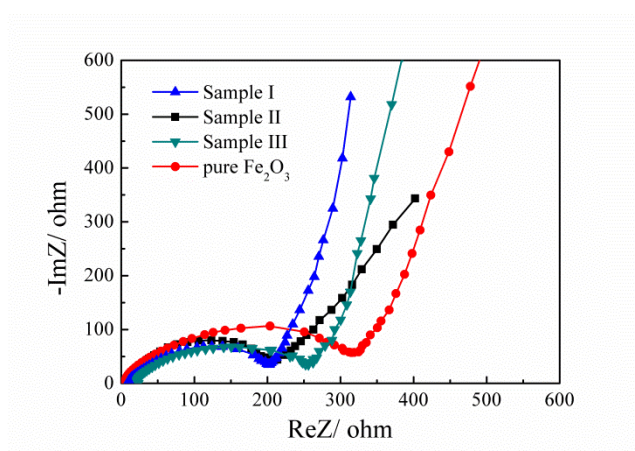

Fig.S6 Nyquist plots of the AC impedance spectra for the carbon-contained samples and carbon-free sample.

5

10

15
